# Supplementary material for: A multifunctional cadmium–organic framework comprising tricarboxytriphenyl amine: selective gas adsorption, liquid-phase separation and luminescence sensing
Source: Royal Society of Chemistry journal article supplement (doi:10.1039/c5ra21980a), 2015-12-17
Supplement: c5ra21980a1.pdf [file c5ra21980a1.pdf]

# Multifunctional Cadmium-Organic Framework Comprising Tricarboxytriphenyl Amine: Selective Gas Adsorption, Liquid-Phase Separation and Luminescent Sensing

Lili Wen,<sup>\*a</sup> Xiangfang Wang,<sup>a</sup> Hui Shi,<sup>a</sup> Kangle Lv<sup>b</sup> and Chenggang Wang<sup>a</sup>

<sup>a</sup> Key Laboratory of Pesticide & Chemical Biology of Ministry of Education, College of Chemistry, Central China Normal University, Wuhan, 430079, P. R. China

<sup>b</sup> Key Laboratory of Catalysis and Materials Science of the State Ethnic Affairs Commission & Ministry of Education, South-Central University for Nationalities, Wuhan 430074, P. R. China

Corresponding Authors. E-mails: wenlili@mail.ccnu.edu.cn (L. Wen). Fax: + 86 27 67867232. Phone: +86 27 67862900.

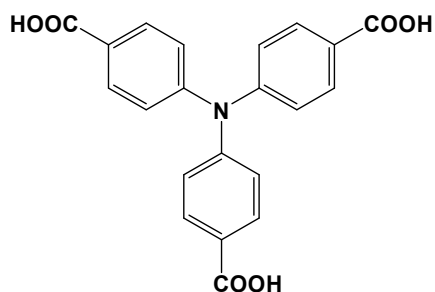

Scheme S1 Tricarboxytriphenyl amine

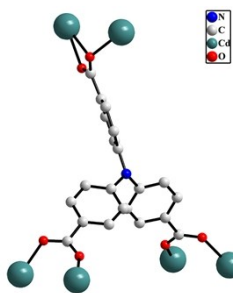

(c)

(a) Coordination environment of TCA<sup>3-</sup> anion in **1**.

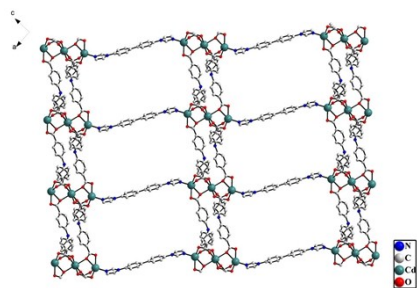

(b) 3D single framework of **1** along *b* axis.

**Figure S1**

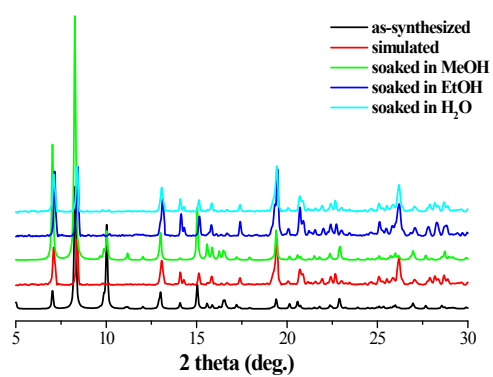

(a)

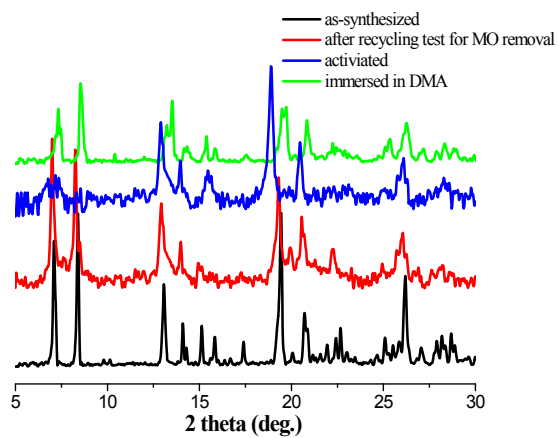

(b)

**Figure S2.** PXRD profiles for complex **1**. Simulated spectrum was calculated from the single crystal data.

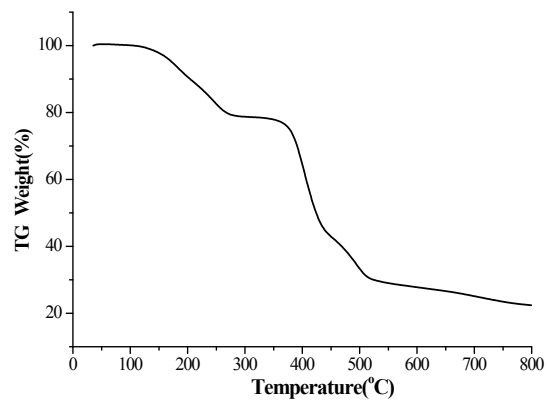

Figure S3. TG curve of complex 1.

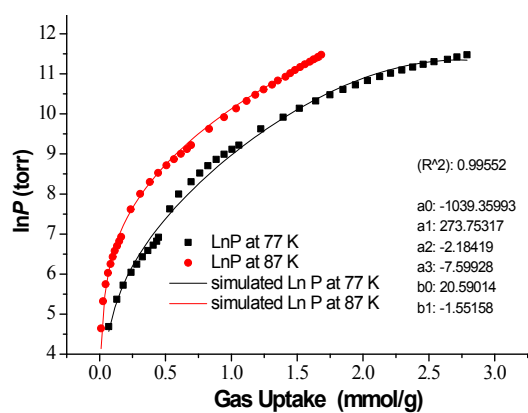

Figure S4. The details of virial equation (solid lines) fitting to the experimental for 1.

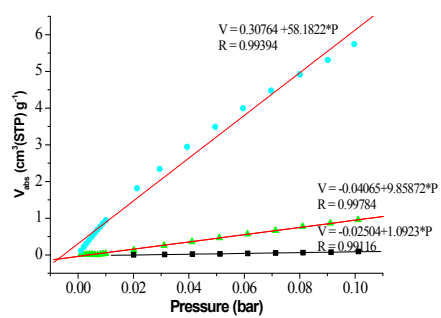

(a)

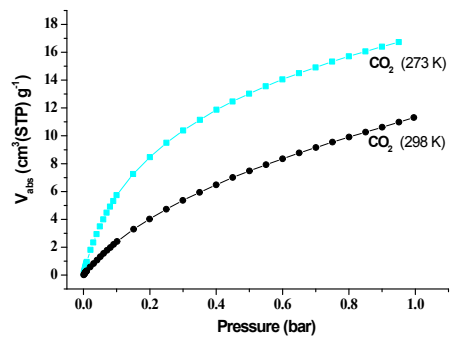

(b)

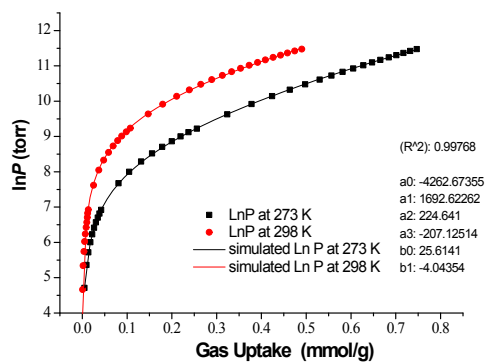

(c)

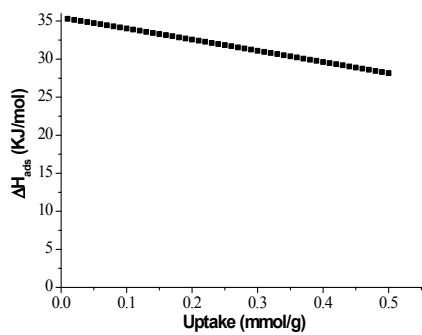

(d)

**Figure S5.** (a) Evaluation of the initial slope in the Henry region of the sorption isotherms of CO<sub>2</sub> (circle), CH<sub>4</sub> (triangle), and N<sub>2</sub> (square) at 273 K. The ratios of the initial slopes allowed an estimation of the sorption selectivity. (b) Sorption isotherms for CO<sub>2</sub> of desolvated **1**. (c) The details of virial equation (solid lines) fitting to the experimental for **1**. (d) The isosteric heat of CO<sub>2</sub> adsorption ( $Q_{st}$ ) for desolvated **1**.

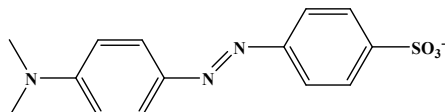

Methyl orange (MO)

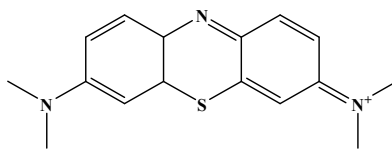

Methylene blue (MB)

**Scheme S2.** The molecular structures of MO and MB.

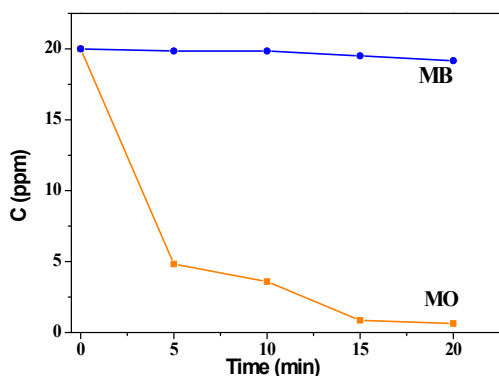

(a)

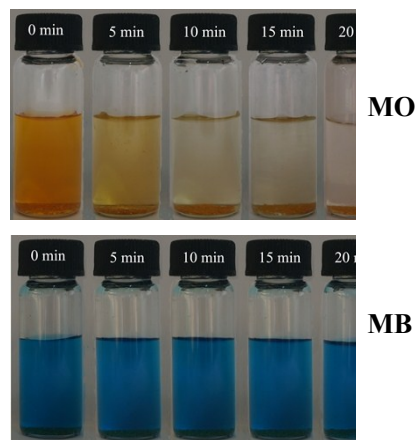

(b)

**Figure S6.** Concentration curves of MO and MB (a) and Photos (b) enrichment progress over **1** in 20 min.

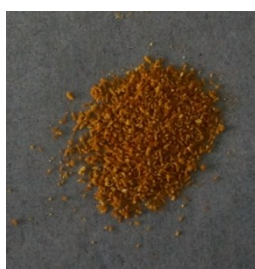

(a)

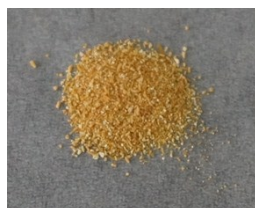

(b)

**Figure S7.** Photos showing MO-loaded **1** (a) and the release of MO from **1** in DMA solution (b).

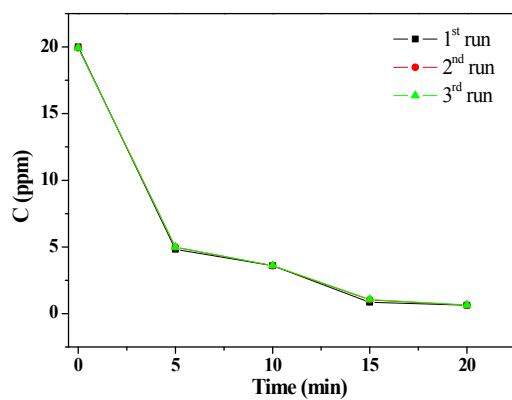

**Figure S8.** Recycling tests with three consecutive runs for **1**.

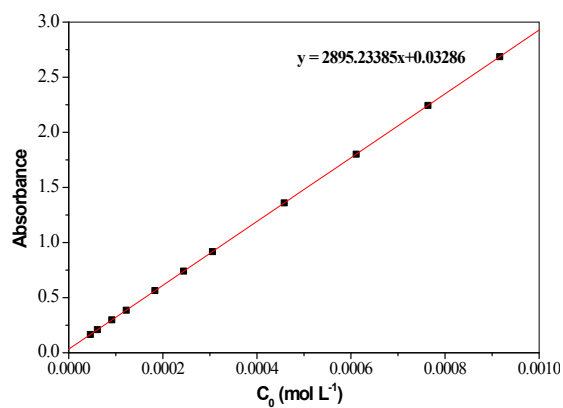

**Figure S9.** The standard curve of MO.

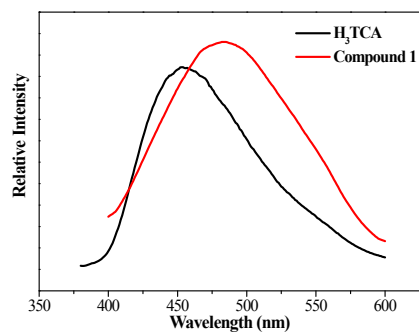

**Figure S10.** Fluorescent emission spectra of complexes **1** and free ligand H<sub>3</sub>TCA in solid state at room temperature.

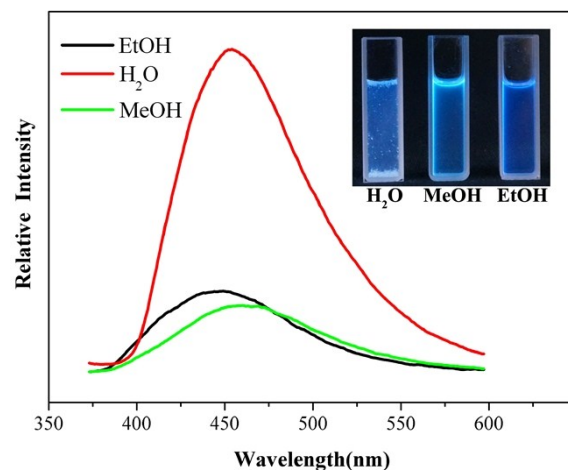

**Figure S11.** Emission spectra of free ligand H<sub>3</sub>TCA in MeOH, EtOH, and H<sub>2</sub>O. Inset: color changes upon addition of different solvents.
